# Supplementary material for: Phosphate-Dependent Regulation of Growth and Stresses Management in Plants
Source: PubMed Central journal article supplement (PMC8581177; doi:10.3389/fpls.2021.679916), 2021-10-28
Supplement: Table_1.pdf [file Table_1.pdf]

Phosphate-dependent regulation of growth and stresses management in plants

N. Bechtaoui<sup>1,\*</sup>, Muhammad Rabiu Kabiru <sup>1,2</sup>; A. Raklami<sup>3</sup>, K. Oufdou<sup>3,1</sup>, Mohamed Hafidi<sup>3,1</sup> and M. Jemo<sup>1,\*</sup>

<sup>1</sup> AgroBiosciences Program, University Mohammed VI Polytechnic (UM6P), Benguerir, Morocco.

<sup>2</sup> Centre for Dryland Agriculture, Bayero University, P.M.B. 3011, Kano, Nigeria

<sup>3</sup> Laboratory of Microbial Biotechnology, Agrosiences, and Environment (BioMAgE), Faculty of Sciences Semlalia, Cadi Ayyad University, Marrakech, Morocco

\* Author for correspondences contacts (Martin Jemo and Noura Bechtaoui (e-mails:

[martin.jemo@um6p.ma](mailto:martin.jemo@um6p.ma) and [noura.bechtaoui@um6p.ma](mailto:noura.bechtaoui@um6p.ma))

Supplementary Table

Table S1. Photosynthesis, growth and uptake, and heavy metals stress, sources of phosphorus, species, and references from which data were retrieved for the meta-analysis.

|                     | Phosphorus source                                               | Plant traits                                                                   | Species                                                                                                                   | References                                                                                                                                                                                                                                                                        |
|---------------------|-----------------------------------------------------------------|--------------------------------------------------------------------------------|---------------------------------------------------------------------------------------------------------------------------|-----------------------------------------------------------------------------------------------------------------------------------------------------------------------------------------------------------------------------------------------------------------------------------|
| Photosynthesis      | KH <sub>2</sub> PO <sub>4</sub>                                 | Net photosynthesis, Shoot dry weight, stomatal conductance, total chlorophyll, | <i>Glycine max</i> , <i>Vigna unguiculata</i> (L.), <i>Triticum aestivum</i> , <i>Triticum aestivum</i> , <i>Zea mays</i> | Chu et al., 2018 ; Moreira et al., 2017 ; Bulgarelli et al., 2017 ; Zhu et al., 2020 ; Izaguirre-Mayoral et al., 2002 ; Meena et al., 2021 ; Taffouo et al., 2014; Sherchand and Paulsen, 1985; Shabbir et al., 2015; Zhengping et al., 2004; Jia et al., 2018; Wang et al., 2017 |
|                     | NH <sub>4</sub> H <sub>2</sub> PO <sub>4</sub>                  |                                                                                | <i>Triticum aestivum</i>                                                                                                  | Rabbi et al., 2017; Arshad et al., 2015                                                                                                                                                                                                                                           |
|                     | CaH <sub>4</sub> O <sub>8</sub> P <sub>2</sub> H <sub>2</sub> O |                                                                                | <i>Triticum aestivum</i> , <i>Zea mays</i>                                                                                | Ozturk et al., 2005; Wang and Ning, 2019                                                                                                                                                                                                                                          |
|                     | NPK                                                             |                                                                                | <i>Triticum aestivum</i>                                                                                                  | Choudhary and Kumar, 2014; Beinsan et al., 2020                                                                                                                                                                                                                                   |
|                     | TSP                                                             |                                                                                | <i>Vigna unguiculata</i> (L.), <i>Triticum aestivum</i>                                                                   | Fouda and Abd-Elhamied, 2017; Nyoki and Ndakidemi, 2014; Nursu'aidah et al., 2014; Moreira et al., 2020; El-Sobky, 2017; Jemo et al., 2017.                                                                                                                                       |
|                     | RP                                                              |                                                                                | <i>Zea mays</i>                                                                                                           | Aliet al., 2014                                                                                                                                                                                                                                                                   |
| Growth and uptake   | KH <sub>2</sub> PO <sub>4</sub>                                 | Shoot dry weight, shoot P concentration, Root P concentration                  | <i>Glycine max</i> , <i>Vigna unguiculata</i> (L.), <i>Zea max</i>                                                        | Jin et al., 2006; Chiulele, 2003; Nafady and Elgharably, 2018; Tang et al., 2019                                                                                                                                                                                                  |
|                     | NH <sub>4</sub> H <sub>2</sub> PO <sub>4</sub>                  |                                                                                | <i>Glycin max</i>                                                                                                         | He et al., 2019; Feng et al.,2021; He et al.,2017; He et al.,2021                                                                                                                                                                                                                 |
|                     | CaH <sub>4</sub> O <sub>8</sub> P <sub>2</sub> H <sub>2</sub> O |                                                                                | <i>Glycin max</i> , <i>Triticum aesticum</i> , <i>Zea mays</i>                                                            | Rotaru and Risnovéanu, 2019; Yu et al., 2016; Zhan et al., 2019                                                                                                                                                                                                                   |
|                     | SSP                                                             |                                                                                |                                                                                                                           | Lima et al., 2017; Rajkhowa, 2017                                                                                                                                                                                                                                                 |
|                     | TSP                                                             |                                                                                |                                                                                                                           | Karimzadeh et al., 2021; HI Mohammadi et al.,2020; Kaya et al., 2020; Jemo et al., 2017.                                                                                                                                                                                          |
| Heavy metals stress | KH <sub>2</sub> PO <sub>4</sub>                                 | Shoot-Cd, -Pb -Zn concentrations                                               | <i>Sedum alfredii</i> , <i>Triticum aestivum</i> , <i>Zea mays</i>                                                        | Huang et al., 2012; Zhang et al., 2016                                                                                                                                                                                                                                            |
|                     | NH <sub>4</sub> H <sub>2</sub> PO <sub>4</sub>                  |                                                                                | <i>Oryza sativa</i> L.; <i>Triticum aestivum</i>                                                                          | Qayyum et al., 2017; Rehman et al., 2018                                                                                                                                                                                                                                          |
|                     | SSP                                                             |                                                                                |                                                                                                                           | Elgharably, 2020; Lavado et al., 2001; Neu et al., 2020; Bashir et al., 2018; Nafady and Elgharably, 2018                                                                                                                                                                         |
|                     | TSP                                                             |                                                                                | <i>Brassica napus</i> L, <i>Hordeum vulgare</i> L, <i>Zea mays</i> , <i>Triticum aestivum</i>                             | Lavado et al., 2001; Neu et al., 2020,                                                                                                                                                                                                                                            |
|                     | Activated RP                                                    |                                                                                | <i>Oryza sativa</i> L.; <i>Triticum aestivum</i>                                                                          | Ahmad et al., 2019; Bashir et al., 2018; Elgharably, 2020                                                                                                                                                                                                                         |
